# Supplementary material
Source: publisher site journal article supplement (https://www.dovepress.com/article/287128)
Supplement: Supplementary file 1 [file get_supplementary_file.php]

**Stage-specific PET Radiomics Prediction Model for Histological Subtype Classification of Non-small cell lung cancer**

**Supplementary Materials**

Yanlei Ji, Qingtao Qiu, Jing Fu, Kai Cui, Xia Chen, Ligang Xing, Xiaorong Sun

Correspondence: Xiaorong Sun, MD, PhD

Department of Nuclear Medicine, Shandong Cancer Hospital and Institute, Shandong First Medical University and Shandong Academy of Medical Sciences, 440 Jiyan Road, Jinan, Shandong, China 250117

Tel/Fax: 86-531-67626287

**
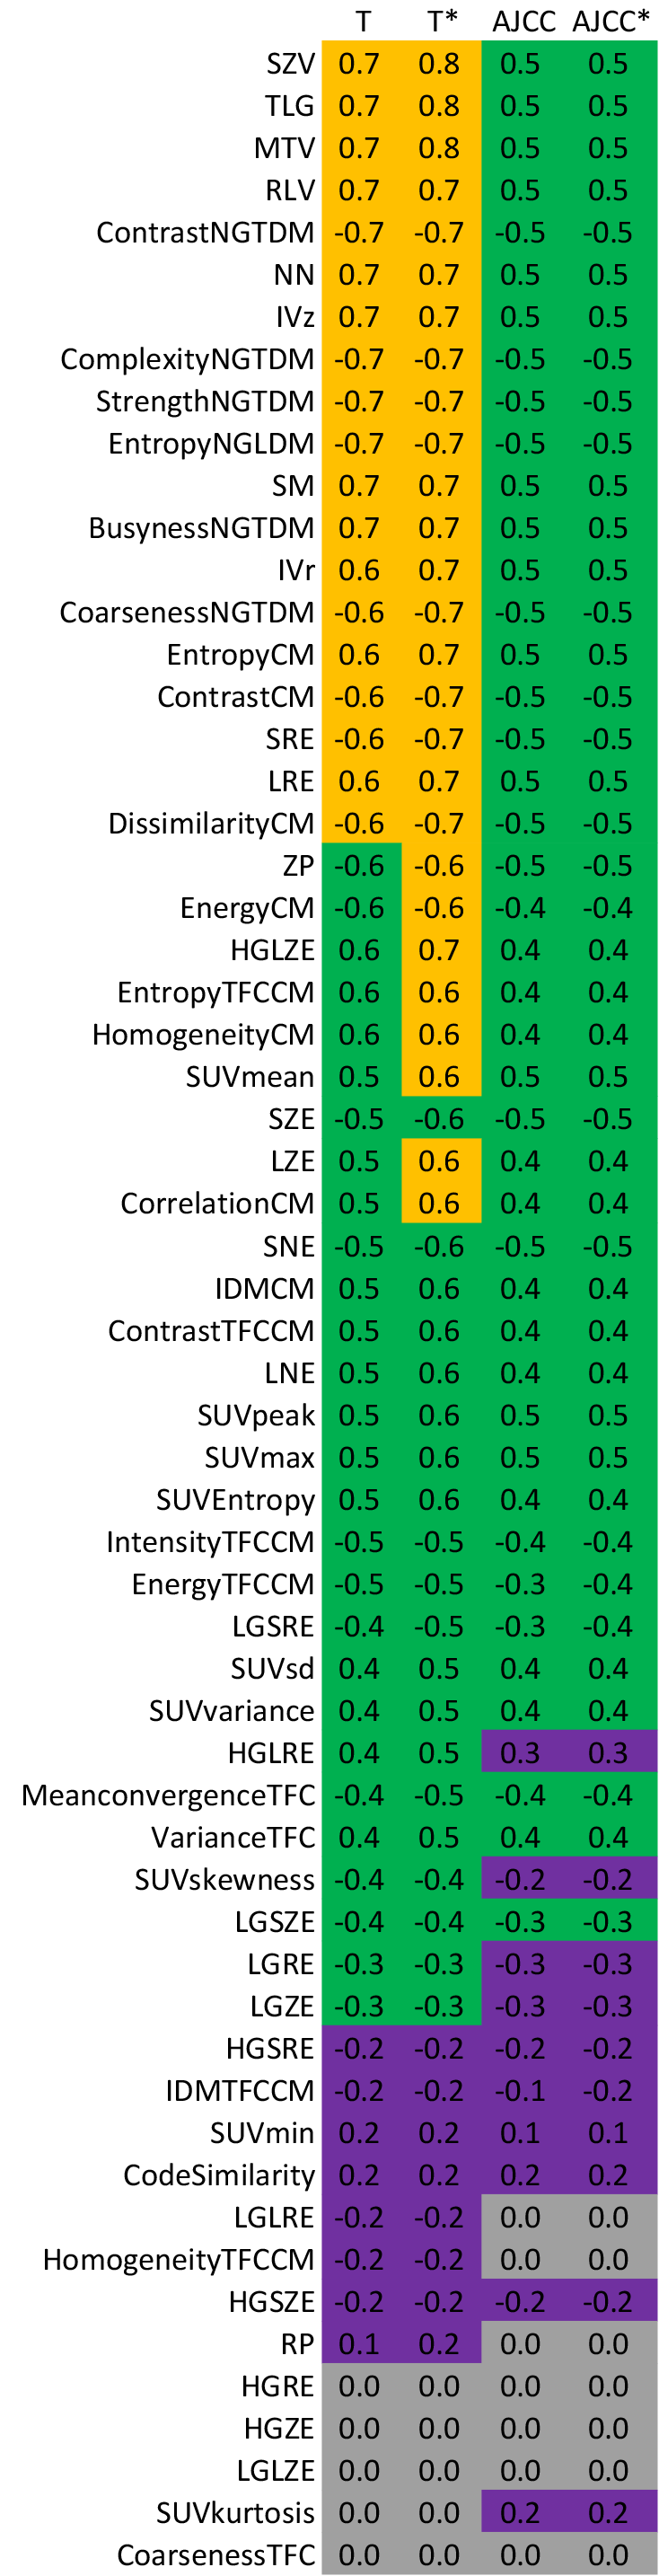
**

**Supplementary Figure 1.** The correlation between 18F-FDG PET/CT radiomic parameters and AJCC staging. Orange: [0.6, 0.8]; green: [0.3, 0.6]; violet: [0.1, 0.3]; gray: [0.0, 0.1]. The numbers in the figure are the same, however, the colors are different due to rounding. T* denotes the T stage subgroup. AJCC* denotes American Joint Committee on Cancer stage subgroup.

**
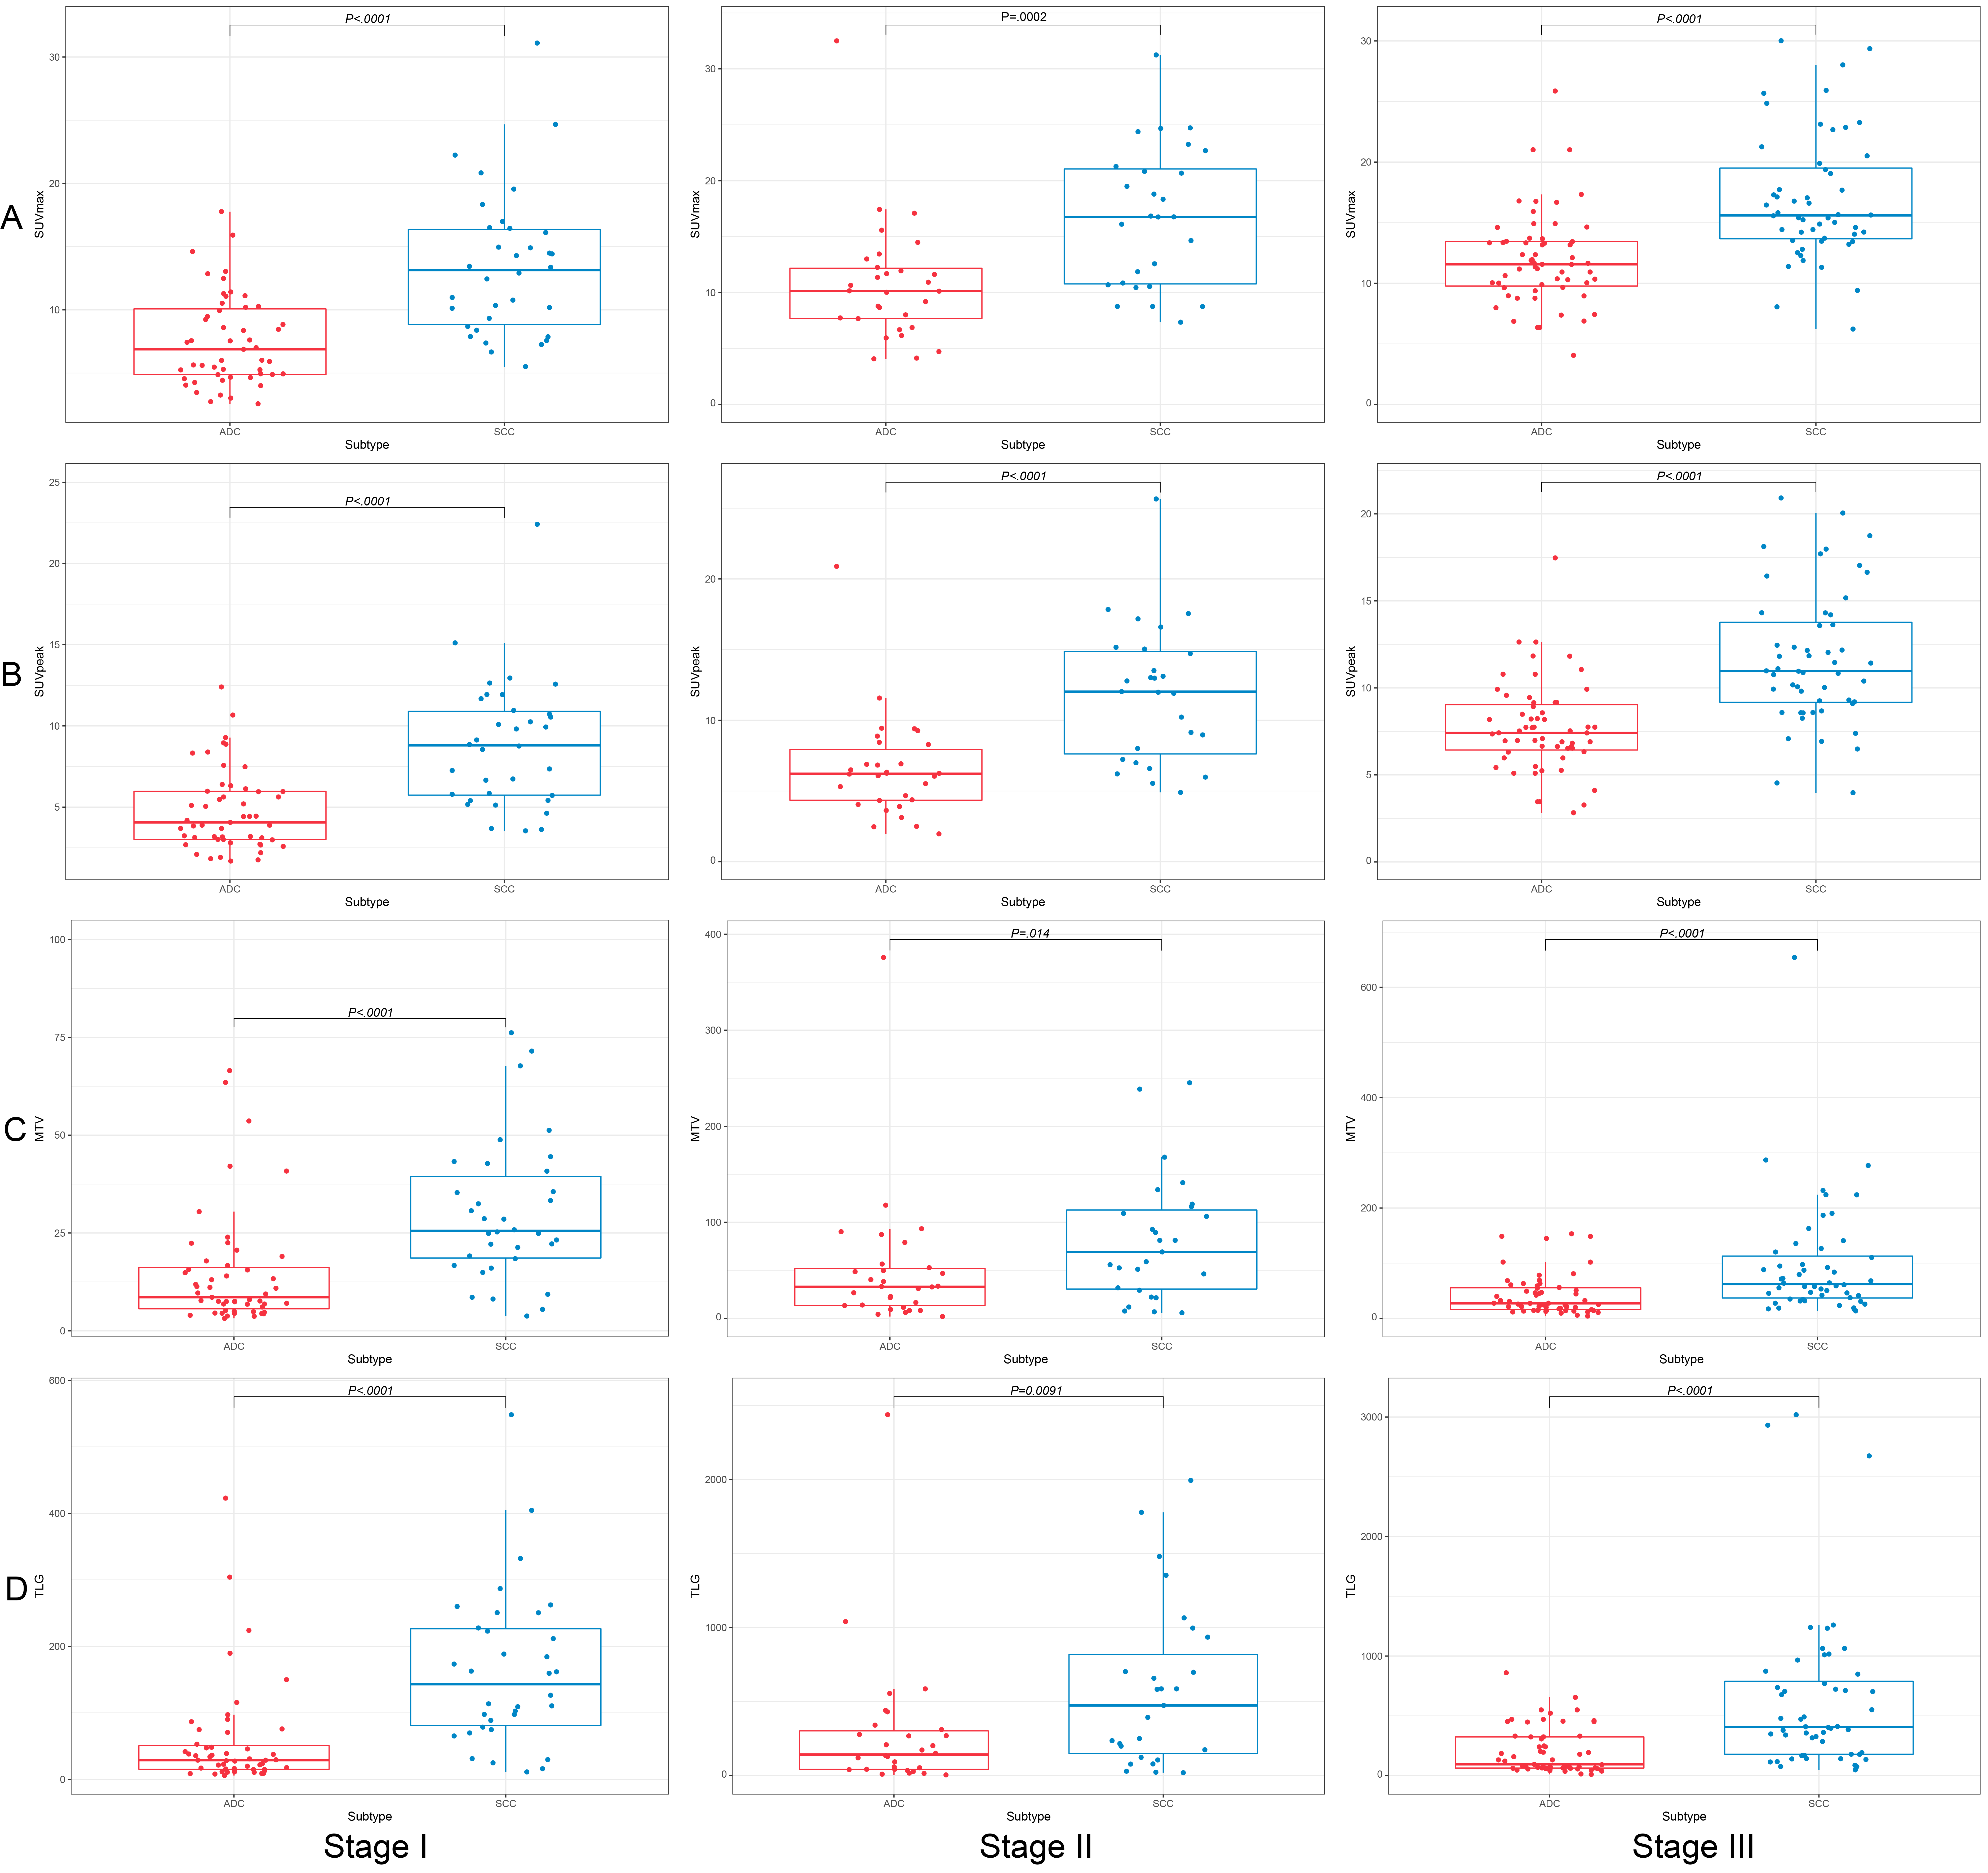
Supplementary Figure 2.** Box-plot of 18F-FDG PET/CT metabolic parameters in stages I–III. SUVmax, SUVpeak, MTV, and TLG in stages I–III are shown in figures 2A, B, C, and D, respectively. SUVmax, maximum standard uptake value; SUVpeak, peak standard uptake value; MTV, metabolic tumor volume; TLG, total

Lesion glycolysis.

**
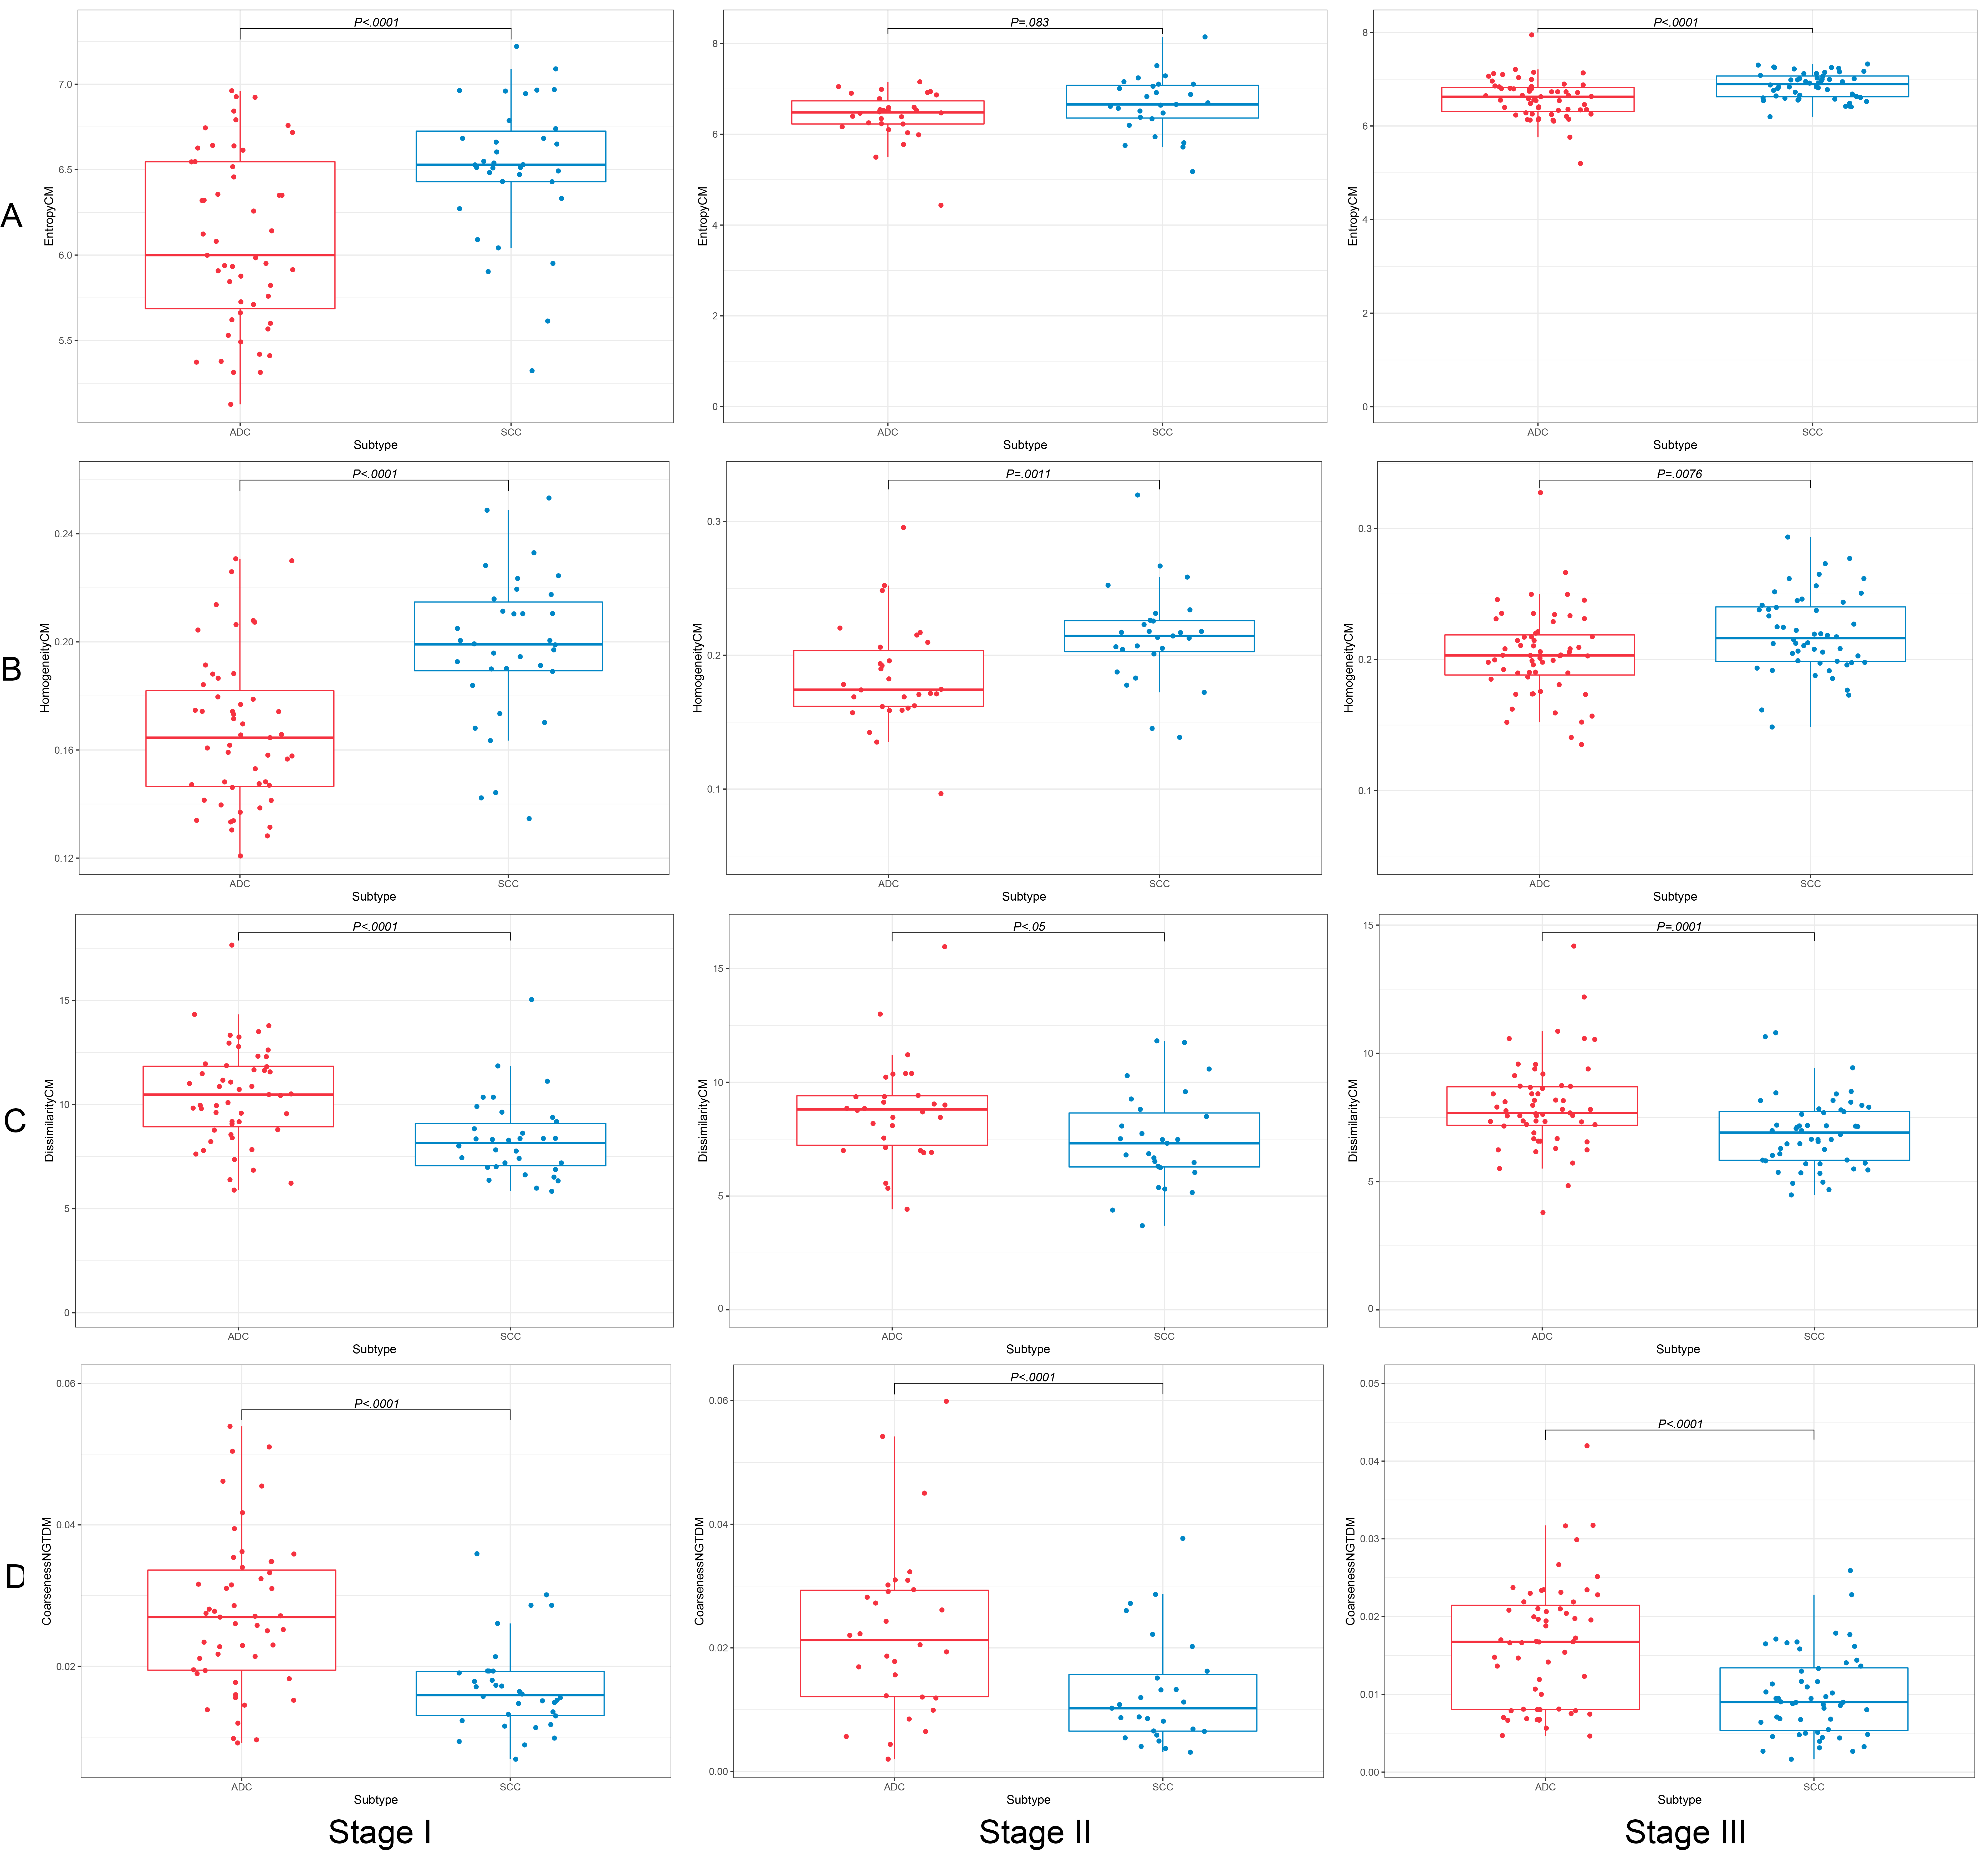
**

**Supplementary Figure 3.** Box-plot of 18F-FDG PET/CT texture parameters in stages I–III. EntropyCM, HomogeneityCM, DissimilarityCM, and CoarsenessNGTDM are shown in figures 3A, B, C, and D, respectively. EntropyCM, entropy derived from co-occurrence matrix; HomogeneityCM, homogeneity derived from co-occurrence matrix; DissimilarityCM, dissimilarity derived from co-occurrence matrix; CoarsenessNGTDM, coarseness derived from neighborhood gray-tone difference matrix.

**Supplementary Table 1** Texture Features

| Scale | Texture type | Parameters |
| --- | --- | --- |
| Global | SUV Gray level histogram | SUVvariance |
|  |  | Standard deviation (SUVsd) |
|  |  | SUVskewness |
|  |  | SUVkurtosis |
|  |  | SUVentropy |
| Local | co-occurrence matrix (CM) | EnergyCM  ContrastCM |
|  |  | EntropyCM |
|  |  | HomogeneityCM |
|  |  | DissimilarityCM |
|  |  | Inverse difference moment (IDMCM) |
|  |  | CorrelatioinCM |
|  | Neighborhood gray-tone  difference matrix (NGTDM) | CoarsenessNGTDM  ContrastNGTDM |
|  |  | BusynessNGTDM |
|  |  | ComplexityNGTDM |
|  |  | StrengthNGTDM |
|  | Texture feature coding (TFC) | CoarsenessTFC |
|  |  | MeanconvergenceTFC |
|  |  | VarianceTFC |
|  | Texture feature coding co-occurrence matrix (TFCCM) | EnergyTFCCM  ContrastTFCCM |
|  |  | EntropyTFCCM |
|  |  | HomogeneityTFCCM |
|  |  | IntensityTFCCM |
|  |  | Inverse difference moment (IDMTFCCM) |
|  |  | Code SimilarityTFCCM |
|  | Neighboring gray-level dependence matrix (NGLDM) | Small number emphasis (SNE)  Large number emphasis (LNE) |
|  |  | Number nonuniformity (NN) |
|  |  | Second moment (SM) |
|  |  | Entropy |
| Regional | Run-length matrix (RLM) | Short run emphasis (SRE) |
|  |  | Long run emphasis (LRE) |
|  |  | Intensity variability (IVr) |
|  |  | Run-length variability (RLV) |
|  |  | Run percentage (RP) |
|  |  | Low gray-level run emphasis (LGRE) |
|  |  | High gray-level run emphasis (HGRE) |
|  |  | Low gray-level Short-run emphasis (LGSRE) |
|  |  | High gray-level Short-run emphasis (HGSRE) |
|  |  | Low gray-level long-run emphasis (LGLRE) |
|  |  | High gray-level long-run emphasis (HGLRE) |
|  | Size zone matrix (SZM) | Short-zone emphasis (SZE) |
|  |  | Large-zone emphasis (LZE) |
|  |  | Intensity variability (IVz) |
|  |  | Size-zone variability (SZV) |
|  |  | Zone percentage (ZP) |
|  |  | Low gray-level zone emphasis (LGZE) |
|  |  | High gray-level zone emphasis (HGZE) |
|  |  | Low gray-level short-zone emphasis (LGSZE) |
|  |  | High gray-level short-zone emphasis (HGSZE) |
|  |  | Low gray-level large-zone emphasis (LGLZE) |
|  |  | High gray-level large-zone emphasis (HGLZE) |

**Supplementary Table 2** Parameters positively correlated with AJCC staging

| Parameters | Stage I | | | Stage II | | | Stage III | | |
| --- | --- | --- | --- | --- | --- | --- | --- | --- | --- |
|  | ADC | SCC |  | ADC | SCC |  | ADC | SCC |  |
|  | Mean±SD | Mean±SD | *P* | Mean±SD | Mean±SD | *P* | Mean±SD | Mean±SD | *P* |
| SUVmin | 1.552±0.300 | 1.776±0.383 | 0.006 | 1.564±0.415 | 1.924±0.568 | 0.002 | 1.596±0.525 | 2.024±0.974 | 0.024 |
| SUVmax | 7.553±3.575 | 13.439±5.690 | <0.001 | 10.761±5.422 | 16.742±6.249 | <0.001 | 11.966±3.814 | 16.929±5.214 | <0.001 |
| SUVmean | 3.202±0.983 | 4.885±1.598 | <0.001 | 4.166±1.787 | 6.026±1.699 | <0.001 | 4.394±1.141 | 6.466±2.025 | <0.001 |
| SUVpeak | 4.790±2.464 | 8.847±3.912 | <0.001 | 6.547±3.577 | 11.886±4.830 | <0.001 | 7.712±2.57 | 11.671±3.816 | <0.001 |
| MTV | 14.566±14.654 | 30.044±17.976 | <0.001 | 49.016±68.673 | 81.204±64.369 | 0.014 | 41.877±37.134 | 96.337±104.586 | <0.001 |
| TLG | 55.719±78.152 | 162.724±117.552 | <0.001 | 283.495±465.422 | 585.512±554.485 | 0.010 | 203.246±192.499 | 632.290±657.711 | <0.001 |
| SUVvariance | 2.740±3.361 | 9.321±9.682 | <0.001 | 5.812±9.699 | 12.594±8.879 | <0.001 | 5.720±3.680 | 11.761±7.848 | <0.001 |
| SUVsd | 1.417±0.856 | 2.721±1.318 | <0.001 | 1.939±1.230 | 3.282±1.149 | <0.001 | 2.246±0.697 | 3.249±1.103 | <0.001 |
| SUVkurtosis | 2.808±1.038 | 3.595±1.110 | 0.001 | 3.290±1.061 | 3.790±0.857 | 0.005 | 3.844±1.448 | 3.704±1.287 | 0.813 |
| SUVentropy | 3.569±0.183 | 3.639±0.176 | 0.093 | 3.629±0.185 | 3.678±0.152 | 0.342 | 3.673±0.173 | 3.763±0.147 | 0.007 |
| EntropyCM | 6.093±0.511 | 6.511±0.407 | <0.001 | 6.406±0.534 | 6.657±0.630 | 0.081 | 6.586±0.415 | 6.862±0.275 | <0.001 |
| HomogeneityCM | 0.169±0.028 | 0.198±0.027 | <0.001 | 0.184±0.038 | 0.213±0.036 | 0.001 | 0.204±0.032 | 0.220±0.030 | 0.008 |
| IDMCM | 0.086±0.023 | 0.114±0.019 | <0.001 | 0.104±0.034 | 0.125±0.032 | 0.007 | 0.116±0.030 | 0.129±0.028 | 0.009 |
| CorrelationCM | 0.632±0.117 | 0.732±0.096 | <0.001 | 0.689±0.116 | 0.757±0.160 | 0.003 | 0.738±0.082 | 0.793±0.059 | <0.001 |
| VarianceTFC | 3.638±0.934 | 4.454±0.953 | 0.001 | 4.361±1.213 | 5.484±1.342 | <0.001 | 4.756±1.245 | 5.199±1.522 | 0.182 |
| ContrastTFCCM | 6.490±1.501 | 7.784±1.319 | <0.001 | 7.843±1.971 | 9.050±1.721 | 0.007 | 8.333±1.794 | 9.130±1.660 | 0.031 |
| EntropyTFCCM | 2.875±0.231 | 3.089±0.228 | <0.001 | 3.111±0.357 | 3.312±0.257 | 0.007 | 3.215±0.339 | 3.369±0.313 | 0.029 |
| Code SimilarityTFCCM | 0.017±0.012 | 0.021±0.010 | 0.006 | 0.018±0.010 | 0.021±0.007 | 0.044 | 0.020±0.010 | 0.023±0.013 | 0.806 |
| BusynessNGTDM | 0.101±0.053 | 0.168±0.057 | <0.001 | 0.281±0.358 | 0.357±0.232 | 0.013 | 0.221±0.145 | 0.430±0.402 | <0.001 |
| LNE | 2.527±0.634 | 3.354±0.787 | <0.001 | 3.237±1.177 | 4.280±1.262 | <0.001 | 3.644±1.189 | 4.167±1.387 | 0.022 |
| NN | 105.940±86.659 | 192.271±101.619 | <0.001 | 278.006±336.037 | 432.34±288.768 | 0.005 | 236.708±177.805 | 506.430±438.699 | <0.001 |
| SM | 3.869±2.302 | 6.354±2.353 | <0.001 | 8.490±8.683 | 12.716±7.575 | 0.004 | 7.559±4.859 | 14.237±11.263 | <0.001 |
| LRE | 1.850±0.338 | 2.225±0.320 | <0.001 | 2.172±0.484 | 2.570±0.482 | 0.001 | 2.329±0.420 | 2.621±0.445 | 0.001 |
| IVr | 11.275±12.834 | 24.219±13.219 | <0.001 | 42.471±68.361 | 82.806±83.405 | 0.019 | 34.900±36.30 | 87.128±117.032 | <0.001 |
| RLV | 160.121±158.028 | 336.765±206.927 | <0.001 | 710.996±1232.758 | 1145.250±1110.146 | 0.010 | 501.630±494.784 | 1444.465±2225.314 | <0.001 |
| HGLRE | 999.526±439.799 | 1143.916±523.895 | 0.132 | 1113.866±414.485 | 1271.950±567.631 | 0.299 | 1155.422±496.576 | 1511.545±585.686 | 0.001 |
| LZE | 2.310±0.822 | 3.563±1.515 | <0.001 | 3.729±2.772 | 7.283±9.640 | 0.001 | 4.279±3.656 | 5.986±6.912 | 0.023 |
| IVz | 4.686±3.299 | 8.398±3.756 | <0.001 | 11.623±13.449 | 17.637±11.745 | 0.014 | 10.244±6.676 | 21.109±18.264 | <0.001 |
| SZV | 97.271±69.285 | 171.146±86.592 | <0.001 | 221.274±239.251 | 338.056±215.642 | 0.010 | 195.733±128.076 | 408.313±327.723 | <0.001 |
| HGLZE | 1214.313±505.369 | 1550.448±730.312 | 0.010 | 1736.612±979.963 | 2422.881±1324.663 | 0.012 | 1790.40±947.147 | 2618.962±1489.945 | <0.001 |

**Supplementary Table 3** Parameters negatively related to AJCC staging

| Parameters | Stage I | | | Stage II | | | Stage III | | |
| --- | --- | --- | --- | --- | --- | --- | --- | --- | --- |
|  | ADC | SCC |  | ADC | SCC |  | ADC | SCC |  |
|  | Mean±SD | Mean±SD | *P* | Mean±SD | Mean±SD | *P* | Mean±SD | Mean±SD | *P* |
| SUVskewness | 1.005±0.336 | 1.009±0.336 | 0.823 | 0.953±0.317 | 0.873±0.325 | 0.288 | 0.993±0.353 | 0.762±0.348 | 0.001 |
| EnergyCM | 0.003±0.001 | 0.002±0.001 | 0.011 | 0.003±0.002 | 0.002±0.001 | 0.051 | 0.002±0.001 | 0.001±0.001 | <0.001 |
| ContrastCM | 176.276±79.573 | 118.247±57.234 | <0.001 | 156.129±87.493 | 95.324±44.941 | 0.003 | 106.409±47.315 | 78.030±29.692 | <0.001 |
| DissimilarityCM | 10.440±2.307 | 8.345±1.875 | <0.001 | 8.767±2.244 | 7.483±2.078 | 0.017 | 7.963±1.692 | 6.886±1.359 | <0.001 |
| MeanconvergenceTFC | 168.463±25.915 | 148.241±17.581 | 0.002 | 154.728±24.284 | 133.145±20.007 | 0.001 | 144.419±22.591 | 136.640±19.002 | 0.182 |
| EnergyTFCCM | 0.087±0.018 | 0.075±0.016 | 0.012 | 0.075±0.020 | 0.066±0.014 | 0.020 | 0.068±0.02 | 0.063±0.018 | 0.176 |
| IntensityTFCCM | 280.907±14.596 | 268.399±12.292 | <0.001 | 273.417±17.123 | 258.597±16.381 | 0.001 | 265.124±13.669 | 258.674±12.414 | 0.022 |
| IDMTFCCM | 0.382±0.029 | 0.376±0.029 | 0.462 | 0.376±0.037 | 0.364±0.023 | 0.051 | 0.372±0.035 | 0.365±0.034 | 0.252 |
| CoarsenessNGTDM | 0.027±0.011 | 0.017±0.006 | <0.001 | 0.022±0.014 | 0.013±0.009 | 0.003 | 0.016±0.008 | 0.010±0.005 | <0.001 |
| ContrastNGTDM | 0.023±0.031 | 0.008±0.018 | 0.001 | 0.020±0.057 | 0.004±0.006 | 0.019 | 0.005±0.010 | 0.001±0.001 | <0.001 |
| ComplexityNGTDM | 68.844±44.612 | 32.113±32.642 | <0.001 | 38.885±35.442 | 20.754±24.255 | 0.009 | 26.311±23.306 | 10.658±10.799 | <0.001 |
| StrengthNGTDM | 48.870±10.947 | 37.089±13.347 | <0.001 | 36.356±16.590 | 27.242±15.732 | 0.046 | 32.834±13.717 | 21.226±13.117 | <0.001 |
| SNE | 0.731±0.076 | 0.654±0.072 | <0.001 | 0.677±0.093 | 0.597±0.078 | <0.001 | 0.628±0.086 | 0.588±0.068 | 0.007 |
| EntropyNGLDM | -1.068±0.437 | -1.552±0.378 | <0.001 | -1.549±0.702 | -2.042±0.722 | 0.006 | -1.643±0.547 | -2.226±0.620 | <0.001 |
| SRE | 0.793±0.077 | 0.708±0.079 | <0.001 | 0.716±0.105 | 0.638±0.113 | 0.006 | 0.692±0.0927 | 0.624±0.090 | <0.001 |
| LGRE | 0.057±0.029 | 0.061±0.031 | 0.597 | 0.042±0.019 | 0.051±0.031 | 0.397 | 0.047±0.027 | 0.037±0.027 | 0.032 |
| LGSRE | 0.042±0.018 | 0.038±0.017 | 0.306 | 0.029±0.014 | 0.030±0.017 | 0.713 | 0.032±0.019 | 0.022±0.016 | 0.004 |
| HGSRE | 500.486±183.214 | 401.149±103.291 | 0.013 | 422.003±128.343 | 365.618±106.969 | 0.049 | 386.544±119.407 | 378.909±122.732 | 0.688 |
| SZE | 0.829±0.051 | 0.784±0.043 | <0.001 | 0.795±0.062 | 0.751±0.055 | 0.006 | 0.762±0.054 | 0.740±0.044 | 0.018 |
| ZP | 0.422±0.086 | 0.351±0.063 | <0.001 | 0.337±0.093 | 0.302±0.078 | 0.073 | 0.324±0.087 | 0.274±0.060 | 0.002 |
| LGZE | 0.053±0.022 | 0.051±0.021 | 0.984 | 0.068±0.099 | 0.044±0.022 | 0.609 | 0.044±0.020 | 0.034±0.022 | 0.009 |
| LGSZE | 0.042±0.017 | 0.037±0.015 | 0.251 | 0.033±0.016 | 0.033±0.014 | 0.936 | 0.033±0.015 | 0.024±0.015 | 0.005 |
| HGSZE | 553.945±158.871 | 476.581±82.462 | 0.016 | 499.676±105.911 | 461.717±82.342 | 0.114 | 468.519±94.458 | 468.237±98.158 | 0.832 |

**Supplementary Table 4** Parameters unrelated to AJCC staging

| Parameters | Stage I | | | Stage II | | | Stage III | | |
| --- | --- | --- | --- | --- | --- | --- | --- | --- | --- |
|  | ADC | SCC |  | ADC | SCC |  | ADC | SCC |  |
|  | Mean±SD | Mean±SD | *P* | Mean±SD | Mean±SD | *P* | Mean±SD | Mean±SD | *P* |
| CoarsenessTFC | 0.012±0.009 | 0.011±0.006 | 1.000 | 0.014±0.008 | 0.012±0.005 | 0.250 | 0.012±0.008 | 0.014±0.010 | 0.439 |
| HomogeneityTFCCM | 0.464±0.026 | 0.462±0.028 | 0.844 | 0.459±0.029 | 0.452±0.019 | 0.059 | 0.457±0.031 | 0.453±0.031 | 0.393 |
| RP | 0.644±0.103 | 0.675±0.114 | 0.134 | 0.643±0.131 | 0.725±0.130 | 0.011 | 0.658±0.124 | 0.699±0.164 | 0.327 |
| HGRE | 599.284±217.784 | 546.817±171.323 | 0.440 | 552.573±148.051 | 538.678±170.290 | 0.620 | 535.288±171.111 | 596.472±186.565 | 0.059 |
| LGLRE | 0.119±0.086 | 0.150±0.096 | 0.139 | 0.092±0.052 | 0.145±0.100 | 0.035 | 0.112±0.073 | 0.103±0.089 | 0.186 |
| HGZE | 647.004±178.772 | 586.961±99.319 | 0.159 | 599.887±105.129 | 593.715±92.052 | 0.811 | 588.448±117.240 | 619.391±125.629 | 0.130 |
| LGLZE | 0.153±0.130 | 0.298±0.340 | 0.003 | 0.165±0.155 | 0.627±1.156 | 0.018 | 0.197±0.163 | 0.334±0.699 | 0.710 |

**Supplementary Table 5** Univariate analysis of clinical factors

| Clinical factor | Stage I | | Stage II | | Stage III | |
| --- | --- | --- | --- | --- | --- | --- |
| Coef. | P-value | Coef. | P-value | Coef. | P-value |
| Age | 0.2633 | 0.3205 | 0.1831 | 0.2710 | 0.1541 | 0.1408 |
| Sex | 0.1907 | 0.1134 | 0.1482 | 0.6244 | -0.1270 | 0.2980 |
| Site | 0.1442 | 0.2429 | 0.2982 | 0.3107 | 0.2319 | 0.1652 |
| Smoke | -0.1361 | 0.2296 | -0.1148 | 0.5548 | -0.0682 | 0.5230 |
| Location | 0.7771 | <0.0001 | 0.8239 | <0.0001 | 0.7827 | <0.0001 |
| Note: Coef., coefficient. | | | | | | |

**Supplementary Table 6** Coefficients of multivariable logistic regression in each stage

| Stage | Parameter | Coefficient | Standard error | P-value |
| --- | --- | --- | --- | --- |
| Stage I | Intercept | 1.7733 | 0.6939 | 0.0106 |
| Location | -5.2335 | 1.3066 | <.0001 |
| Rad_Score | -1.9105 | 0.5434 | 0.0004 |
| Stage II | Intercept | 1.8585 | 0.6337 | 0.0034 |
| Location | -4.1899 | 0.9989 | <.0001 |
| Rad_Score | -0.0192 | 0.5558 | 0.0067 |
| Stage III | Intercept | 2.5108 | 0.6795 | 0.0002 |
| Location | -5.4000 | 1.1880 | <.0001 |
| Rad_Score | -1.9886 | 0.5194 | 0.0001 |
